# Supplementary material
Source: HighWire-hosted journal article supplement (https://jnm.snmjournals.org/highwire/filestream/95474/field_highwire_adjunct_files/0/219980_Supplemental_Data.pdf)
Supplement: 219980_Supplemental_Data.pdf [file 219980_Supplemental_Data.pdf]

Supplemental table 1: Characteristics of healthy volunteers

|                             | <b>SALINE-GELO</b> | <b>GELO-SALINE</b> |
|-----------------------------|--------------------|--------------------|
| Age (years)                 | 29.0 ± 9.3         | 19.8 ± 0.4         |
| Sex (m/f)                   | 3/2                | 2/3                |
| BMI (kg/m <sup>2</sup> )    | 21.4 ± 1.4         | 20.3 ± 3.4         |
| HbA1c (mmol/mol)            | 34.6 ± 1.9         | 35.2 ± 2.0         |
| Creatine clearance (cc/min) | 116 ± 27           | 106 ± 15           |

Supplemental table 2: Characteristics of insulinoma patients

|          | <b>Insulinoma type</b> | <b>Tumor Ø (mm)</b> | <b>Scan time (h)</b> | <b>Tracer</b> | <b>Injection dose (MBq(ug))</b> |
|----------|------------------------|---------------------|----------------------|---------------|---------------------------------|
| Patient1 | Benign                 | 10                  | 0.33, 4, 22, 70      | DOTA-exendin  | 89(30)                          |
| Patient2 | Benign                 | 17                  | 0.25, 3.5, 24, 70    | DOTA-exendin  | 97(30)                          |
| Patient3 | Benign                 | 13                  | 0.33, 3.5, 96 90/30  | DOTA-exendin  | 90(30)                          |
| Patient4 | Malignant              | 15                  | 0.25, 3.5, 22, 120   | DOTA-exendin  | 145(20)                         |
| Patient5 | Malignant              | 14                  | 0.25, 3.5, 21.5,120  | DTPA-exendin  | 145(10)                         |
